# Supplementary material
Source: publisher site journal article supplement (https://www.dovepress.com/article/558601)
Supplement: Supplementary file 1 [file 558601%20Supplementary%20table%201.docx]

Supplementary Table 1. Hardy–Weinberg equilibrium analysis for VEGFA rs2010963 genotypes in strabismus cases and non-diabetic healthy controls.

| **Group** | **Genotype** | **Observed (n)** | **Expected under HWE (n)** | **HWE χ² (group-level)** | **HWE p-value (group-level)** |
| --- | --- | --- | --- | --- | --- |
| Cases (n=43) | GG | 24 | 22.35 | 1.57 | 0.21 |
| Cases (n=43) | GC | 14 | 17.3 | 1.57 | 0.21 |
| Cases (n=43) | CC | 5 | 3.35 | 1.57 | 0.21 |
| Controls (n=170) | GG | 50 | 37.65 | 14.46 | 1.4×10⁻⁴ |
| Controls (n=170) | GC | 60 | 84.71 | 14.46 | 1.4×10⁻⁴ |
| Controls (n=170) | CC | 60 | 47.65 | 14.46 | 1.4×10⁻⁴ |

Observed and expected genotype counts for VEGFA rs2010963 are shown separately for strabismus cases (n=43) and controls (n=170). Expected counts under Hardy–Weinberg equilibrium (HWE) were calculated from the observed allele frequencies within each group. The HWE χ² and p-values are shown at the group level (same value repeated across genotypes for clarity).
